# Supplementary material
Source: PubMed Central journal article supplement (PMC10355918)
Supplement: 12672_2017_317_MOESM1_ESM.pdf [file 12672_2017_317_MOESM1_ESM.pdf]

## **Supplementary Material**

### **Elevated aromatase (*CYP19A1*) expression is associated with a poor survival of patients with estrogen receptor positive breast cancer**

#### **Hormones and Cancer**

Andrea Friesenhengst, Tamara Pribitzer-Winner, Heidi Miedl, Katharina Pröstling, and Martin Schreiber

\*Corresponding author: Martin Schreiber, Ph.D,  
Department of Obstetrics & Gynecology, Medical University of Vienna,  
Waehringer Guertel 18-20/5Q, 1090 Vienna, Austria  
*E-mail address:* [martin.schreiber@muv.ac.at](mailto:martin.schreiber@muv.ac.at)

**Supplementary Table 1** Representation of the indicated clinical characteristics in human breast cancer patients with SNP rs10046 genotypes CC, CT and TT

|                   |            | <b>Sum</b> | <b>CC</b>  | <b>CT</b>  | <b>TT</b>  |
|-------------------|------------|------------|------------|------------|------------|
| All patients      |            | 119        | 28 (23.5%) | 55 (46.2%) | 36 (30.3%) |
| Age               | <50        | 44         | 13 (29.5%) | 19 (43.2%) | 12 (27.3%) |
|                   | ≥50        | 75         | 15 (20.0%) | 36 (48.0%) | 24 (32.0%) |
| Menopausal status | pre        | 33         | 9 (27.3%)  | 14 (42.4%) | 10 (30.3%) |
|                   | post       | 67         | 15 (20.9%) | 30 (44.8%) | 23 (34.3%) |
|                   | na         | 19         | 5          | 11         | 3          |
| Tumor size        | pT1        | 37         | 9 (24.3%)  | 15 (40.5%) | 13 (35.1%) |
|                   | pT2-4      | 80         | 18 (22.5%) | 39 (48.8%) | 23 (28.8%) |
|                   | na         | 2          | 1          | 1          | 0          |
| Tumor type        | ductal     | 83         | 17 (20.5%) | 43 (51.8%) | 23 (27.7%) |
|                   | lobular    | 32         | 10 (31.3%) | 10 (31.3%) | 12 (37.5%) |
|                   | na         | 4          | 1          | 2          | 1          |
| Stage             | 1          | 24         | 5 (20.8%)  | 10 (41.7%) | 9 (37.5%)  |
|                   | 2-4        | 84         | 21 (25.0%) | 38 (45.2%) | 25 (29.8%) |
|                   | na         | 11         | 2          | 7          | 2          |
| Grade             | pG1-2      | 70         | 15 (21.4%) | 35 (50.0%) | 20 (28.6%) |
|                   | pG3        | 47         | 12 (25.5%) | 19 (40.4%) | 16 (34.0%) |
|                   | na         | 2          | 1          | 1          | 0          |
| Lymph node status | pN0        | 41         | 10 (24.4%) | 18 (43.9%) | 13 (31.7%) |
|                   | pN+        | 70         | 17 (24.3%) | 33 (47.1%) | 20 (28.6%) |
|                   | na         | 8          | 1          | 4          | 3          |
| ER status         | pos        | 52         | 12 (23.1%) | 21 (40.4%) | 19 (36.5%) |
|                   | neg        | 61         | 13 (21.3%) | 31 (50.8%) | 17 (27.9%) |
|                   | na         | 6          | 3          | 3          | 0          |
| PR status         | pos        | 24         | 5 (20.8%)  | 12 (50.0%) | 7 (29.2%)  |
|                   | neg        | 60         | 13 (21.7%) | 29 (48.3%) | 18 (30.0%) |
|                   | na         | 35         | 10         | 14         | 11         |
| HER2 status       | pos        | 17         | 3 (17.6%)  | 9 (52.9%)  | 5 (29.4%)  |
|                   | neg        | 73         | 16 (21.9%) | 35 (47.9%) | 22 (30.1%) |
|                   | na         | 29         | 9          | 11         | 9          |
| p53 status        | pos        | 33         | 10 (30.3%) | 16 (48.5%) | 7 (21.2%)  |
|                   | neg        | 58         | 9 (15.5%)  | 28 (48.3%) | 21 (36.2%) |
|                   | na         | 28         | 9          | 11         | 8          |
| Tumor Subtype     | HER2 type  | 12         | 2 (16.7%)  | 6 (50.0%)  | 4 (33.3%)  |
|                   | Luminal    | 42         | 9 (21.4%)  | 21 (50.0%) | 12 (28.6%) |
|                   | Triple neg | 31         | 8 (25.8%)  | 16 (51.6%) | 7 (22.6%)  |
|                   | na         | 34         | 9          | 12         | 13         |

**Supplementary Table 2** Details of the analyses of the overall, disease-free and metastasis-free survival in the indicated patient subpopulations

| Overall Survival         |            | All patients |            | CYP19A1 high |            | CYP19A1 low |            | CC (rs10046) |            | CT (rs10046) |            | TT (rs10046) |            |
|--------------------------|------------|--------------|------------|--------------|------------|-------------|------------|--------------|------------|--------------|------------|--------------|------------|
|                          |            | All          | event-free | All          | event-free | All         | event-free | All          | event-free | All          | event-free | All          | event-free |
| All patients             | number (n) | 100          | 43         | 26           | 8          | 74          | 35         | 28           | 13         | 55           | 22         | 36           | 14         |
|                          | events (n) | 57           | 0          | 18           | 0          | 39          | 0          | 15           | 0          | 33           | 0          | 22           | 0          |
|                          | mean (y)   | 7,55         | 10,96      | 6,53         | 11,68      | 7,92        | 10,83      | 6,46         | 7,63       | 6,99         | 10,54      | 6,63         | 10,36      |
|                          | median (y) | 6,70         | 13,13      | 4,88         | 13,33      | 7,49        | 13,13      | 5,40         | 12,55      | 5,15         | 13,03      | 5,62         | 13,54      |
|                          | range (y)  | 0-14.7       | 0-14.7     | 0.6-14.2     | 1.0-14.2   | 0-14.7      | 0-14.7     | 0-16.6       | 0-16.6     | 0-14.4       | 0-14.4     | 0-14.3       | 0-14.3     |
| ER pos patients          | number (n) | 40           | 17         | 11           | 1          | 29          | 16         | 12           | 3          | 21           | 8          | 19           | 8          |
|                          | events (n) | 23           | 0          | 10           | 0          | 13          | 0          | 9            | 0          | 13           | 0          | 11           | 0          |
|                          | mean (y)   | 8,81         | 12,68      | 4,65         | 12,04      | 10,39       | 12,72      | 8,01         | 12,83      | 7,11         | 10,50      | 6,90         | 10,46      |
|                          | median (y) | 10,50        | 13,32      | 3,86         | 12,04      | 12,55       | 13,33      | 9,23         | 12,58      | 5,48         | 12,96      | 6,12         | 13,75      |
|                          | range (y)  | 0-14.7       | 0-14.7     | 0.6-12.0     | 12.0       | 0-14.7      | 0-14.7     | 1.1-13.4     | 2.6-13.4   | 0-14.4       | 0-14.4     | 0-14.3       | 0-14.3     |
| ER neg patients          | number (n) | 56           | 23         | 14           | 6          | 42          | 17         | 13           | 8          | 31           | 11         | 17           | 6          |
|                          | events (n) | 33           | 0          | 8            | 0          | 25          | 0          | 5            | 0          | 20           | 0          | 11           | 0          |
|                          | mean (y)   | 6,55         | 9,70       | 7,53         | 11,35      | 6,26        | 9,20       | 6,52         | 7,58       | 6,29         | 9,78       | 6,32         | 10,23      |
|                          | median (y) | 4,56         | 12,88      | 6,08         | 13,43      | 4,49        | 12,88      | 4,43         | 7,27       | 4,52         | 12,93      | 4,74         | 13,19      |
|                          | range (y)  | 0-14.5       | 0-14.5     | 0.6-14.2     | 1.0-14.2   | 0-14.5      | 0-14.5     | 0-16.6       | 0-16.6     | 0-14.4       | 0-14.4     | 0.4-14.2     | 3.1-14.2   |
| Disease-free survival    |            |              |            |              |            |             |            |              |            |              |            |              |            |
| All patients             | number (n) | 100          | 38         | 26           | 6          | 74          | 32         | 28           | 14         | 55           | 24         | 36           | 16         |
|                          | events (n) | 62           | 0          | 20           | 0          | 42          | 0          | 14           | 0          | 31           | 0          | 20           | 0          |
|                          | mean (y)   | 5,48         | 10,06      | 4,29         | 10,03      | 5,90        | 10,07      | 4,94         | 7,20       | 5,31         | 8,91       | 5,67         | 9,13       |
|                          | median (y) | 3,39         | 12,82      | 2,18         | 13,40      | 3,86        | 12,63      | 2,25         | 9,52       | 3,14         | 12,53      | 3,76         | 12,08      |
|                          | range (y)  | 0-14.7       | 0-14.7     | 0-14.2       | 0.6-14.2   | 0-14.7      | 0-14.7     | 0-14.5       | 0-14.5     | 0-14.4       | 0-14.4     | 0-14.3       | 0-14.3     |
| ER pos patients          | number (n) | 40           | 14         | 11           | 0          | 29          | 14         | 12           | 4          | 21           | 9          | 19           | 9          |
|                          | events (n) | 26           | 0          | 11           | 0          | 15          | 0          | 8            | 0          | 12           | 0          | 10           | 0          |
|                          | mean (y)   | 6,67         | 11,85      | 2,91         |            | 8,10        | 11,85      | 6,42         | 12,31      | 6,21         | 8,61       | 5,84         | 8,37       |
|                          | median (y) | 4,86         | 13,33      | 2,06         |            | 10,77       | 13,33      | 4,86         | 12,57      | 4,84         | 12,51      | 5,43         | 11,56      |
|                          | range (y)  | 0-14.7       | 0-14.7     | 0-7.5        |            | 0-14.7      | 0-14.7     | 0-13.4       | 0.8-13.4   | 0-14.4       | 0-14.4     | 0-14.3       | 0-14.3     |
| ER neg patients          | number (n) | 56           | 22         | 14           | 5          | 42          | 17         | 13           | 7          | 31           | 12         | 17           | 7          |
|                          | events (n) | 34           | 0          | 9            | 0          | 25          | 0          | 6            | 0          | 19           | 0          | 10           | 0          |
|                          | mean (y)   | 4,44         | 8,68       | 4,73         | 9,37       | 4,35        | 8,47       | 4,73         | 7,36       | 3,91         | 8,00       | 5,47         | 10,11      |
|                          | median (y) | 2,11         | 12,20      | 1,89         | 13,49      | 2,18        | 11,85      | 1,67         | 8,27       | 2,29         | 8,22       | 3,25         | 12,60      |
|                          | range (y)  | 0-14.5       | 0-14.5     | 0.1-14.2     | 0.6-14.2   | 0-14.5      | 0-14.5     | 0-14.5       | 0-14.5     | 0-14.4       | 0-14.4     | 0-14.2       | 0.5-14.2   |
| Metastasis-free survival |            |              |            |              |            |             |            |              |            |              |            |              |            |
| All patients             | number (n) | 100          | 48         | 26           | 8          | 74          | 40         | 28           | 16         | 55           | 28         | 36           | 19         |
|                          | events (n) | 52           | 0          | 18           | 0          | 34          | 0          | 12           | 0          | 27           | 0          | 17           | 0          |
|                          | mean (y)   | 6,30         | 9,91       | 4,60         | 8,10       | 6,90        | 10,27      | 5,66         | 7,55       | 5,75         | 8,31       | 6,02         | 9,23       |
|                          | median (y) | 4,38         | 12,80      | 3,08         | 8,88       | 5,03        | 12,80      | 3,86         | 9,52       | 3,68         | 12,18      | 3,76         | 12,60      |
|                          | range (y)  | 0-14.7       | 0-14.7     | 0-14.2       | 0.6-14.2   | 0-14.7      | 0-14.7     | 0-16.6       | 0-16.6     | 0-14.4       | 0-14.4     | 0-14.3       | 0-14.3     |
| ER pos patients          | number (n) | 40           | 19         | 11           | 0          | 29          | 19         | 12           | 4          | 21           | 9          | 19           | 12         |
|                          | events (n) | 21           | 0          | 11           |            | 10          | 0          | 8            | 0          | 12           | 0          | 7            | 0          |
|                          | mean (y)   | 7,78         | 11,95      | 3,19         |            | 9,52        | 11,95      | 6,78         | 12,31      | 6,38         | 8,61       | 6,41         | 8,72       |
|                          | median (y) | 7,37         | 13,31      | 2,06         |            | 11,57       | 13,31      | 5,58         | 12,57      | 5,45         | 12,51      | 5,57         | 12,12      |
|                          | range (y)  | 0-14.7       | 0-14.7     | 0-7.5        |            | 0-14.7      | 0-14.7     | 0-13.4       | 0.8-13.4   | 0-14.4       | 0-14.4     | 0-14.3       | 0-14.3     |
| ER neg patients          | number (n) | 56           | 27         | 14           | 7          | 42          | 20         | 13           | 9          | 31           | 16         | 17           | 7          |
|                          | events (n) | 29           | 0          | 7            | 0          | 22          | 0          | 4            | 0          | 15           | 0          | 10           | 0          |
|                          | mean (y)   | 5,08         | 8,25       | 5,08         | 7,36       | 5,08        | 8,57       | 5,94         | 7,95       | 4,58         | 7,19       | 5,57         | 10,12      |
|                          | median (y) | 3,11         | 11,85      | 3,08         | 4,45       | 3,11        | 12,20      | 3,46         | 8,27       | 2,93         | 4,57       | 3,25         | 12,60      |
|                          | range (y)  | 0-14.5       | 0-14.5     | 0-14.2       | 0.6-14.2   | 0-14.5      | 0-14.5     | 0-16.6       | 0-16.6     | 0-14.4       | 0-14.4     | 0-14.2       | 0.5-14.2   |

All, all patients in the indicated analysis; event-free, those patients without an event in the indicated analysis; ER, estrogen receptor; pos, positive; neg, negative. The number of patients (n), the number of events (n), as well as the mean, median, and range for the follow-up time in years (y) is indicated in each analysis and subgroup

**Supplementary Table 3** Details of the analyses of the survival free of lung, liver and bone metastasis in the indicated patient subpopulations

| Lung metastasis-free survival  |            | All patients |            | CYP19A1 high |            | CYP19A1 low |            | CC (rs10046) |            | CT (rs10046) |            | TT (rs10046) |            |
|--------------------------------|------------|--------------|------------|--------------|------------|-------------|------------|--------------|------------|--------------|------------|--------------|------------|
|                                |            | All          | event-free | All          | event-free | All         | event-free | All          | event-free | All          | event-free | All          | event-free |
| All patients                   | number (n) | 100          | 86         | 26           | 20         | 74          | 66         | 28           | 24         | 55           | 49         | 36           | 30         |
|                                | events (n) | 14           | 0          | 6            | 0          | 8           | 0          | 4            | 0          | 6            | 0          | 6            | 0          |
|                                | mean (y)   | 7,33         | 7,72       | 6,16         | 6,41       | 7,74        | 8,11       | 6,37         | 6,27       | 6,77         | 7,10       | 6,44         | 7,09       |
|                                | median (y) | 6,07         | 6,94       | 4,34         | 4,23       | 6,94        | 7,66       | 5,22         | 3,95       | 4,60         | 5,16       | 5,12         | 6,04       |
|                                | range (y)  | 0-14.7       | 0-14.7     | 0.6-14.2     | 0.6-14.2   | 0-14.7      | 0-14.7     | 0-16.6       | 0-16.6     | 0-14.4       | 0-14.4     | 0-14.3       | 0-14.3     |
| ER pos patients                | number (n) | 40           | 34         | 11           | 7          | 29          | 27         | 12           | 9          | 21           | 19         | 19           | 18         |
|                                | events (n) | 6            | 0          | 4            | 0          | 2           | 0          | 3            | 0          | 2            | 0          | 1            | 0          |
|                                | mean (y)   | 8,66         | 8,81       | 4,30         | 2,50       | 10,31       | 10,45      | 7,79         | 7,39       | 7,08         | 7,27       | 6,90         | 6,91       |
|                                | median (y) | 9,62         | 11,17      | 3,86         | 2,30       | 12,52       | 12,55      | 9,13         | 8,22       | 5,49         | 5,49       | 6,13         | 6,04       |
|                                | range (y)  | 0-14.7       | 0-14.7     | 0.6-10.0     | 0.6-5.2    | 0-14.7      | 0-14.7     | 1.1-13.4     | 1.1-13.4   | 0-14.4       | 0-14.4     | 0-14.3       | 0-14.3     |
| ER neg patients                | number (n) | 56           | 48         | 14           | 12         | 42          | 36         | 13           | 12         | 31           | 27         | 17           | 12         |
|                                | events (n) | 8            | 0          | 2            | 0          | 6           | 0          | 1            | 0          | 4            | 0          | 5            | 0          |
|                                | mean (y)   | 6,27         | 6,85       | 7,12         | 8,11       | 5,99        | 6,43       | 6,52         | 6,99       | 5,92         | 6,28       | 5,91         | 7,37       |
|                                | median (y) | 4,44         | 4,57       | 5,58         | 8,28       | 4,31        | 4,53       | 4,43         | 5,74       | 4,01         | 4,20       | 3,25         | 6,25       |
|                                | range (y)  | 0-14.5       | 0-14.5     | 0.6-14.2     | 0.6-14.2   | 0-14.5      | 0-14.5     | 0-16.6       | 0-16.6     | 0-14.4       | 0-14.4     | 0.5-14.3     | 0.5-14.3   |
| Liver metastasis-free survival |            |              |            |              |            |             |            |              |            |              |            |              |            |
| All patients                   | number (n) | 100          | 83         | 26           | 23         | 74          | 60         | 28           | 23         | 55           | 48         | 36           | 30         |
|                                | events (n) | 17           | 0          | 3            | 0          | 14          | 0          | 5            | 0          | 7            | 0          | 6            | 0          |
|                                | mean (y)   | 7,39         | 8,03       | 6,33         | 6,55       | 7,76        | 8,60       | 6,24         | 6,21       | 6,87         | 7,18       | 6,47         | 7,36       |
|                                | median (y) | 6,54         | 7,53       | 4,41         | 4,45       | 7,49        | 11,17      | 4,92         | 3,46       | 4,77         | 4,96       | 5,22         | 6,28       |
|                                | range (y)  | 0-14.7       | 0-14.7     | 0-14.2       | 0-14.2     | 0-14.7      | 0-14.7     | 0-16.6       | 0-16.6     | 0-14.4       | 0-14.4     | 0-14.3       | 0-14.3     |
| ER pos patients                | number (n) | 40           | 35         | 11           | 8          | 29          | 27         | 12           | 9          | 21           | 17         | 19           | 18         |
|                                | events (n) | 5            | 0          | 3            | 0          | 2           | 0          | 3            | 0          | 4            | 0          | 1            | 0          |
|                                | mean (y)   | 8,68         | 9,10       | 4,50         | 4,46       | 10,27       | 10,48      | 7,87         | 7,73       | 6,92         | 7,57       | 6,87         | 7,25       |
|                                | median (y) | 10,14        | 11,57      | 3,86         | 3,19       | 12,52       | 12,55      | 8,86         | 8,22       | 5,45         | 6,71       | 6,13         | 6,28       |
|                                | range (y)  | 0-14.7       | 0-14.7     | 0-12.0       | 1.1-12.0   | 0-14.7      | 0-14.7     | 1.1-13.4     | 1.1-13.4   | 0-14.4       | 0-14.4     | 0-14.3       | 0-14.3     |
| ER neg patients                | number (n) | 56           | 45         | 14           | 14         | 42          | 31         | 13           | 11         | 31           | 28         | 17           | 12         |
|                                | events (n) | 11           | 0          | 0            | 0          | 11          | 0          | 2            | 0          | 3            | 0          | 5            | 0          |
|                                | mean (y)   | 6,37         | 7,11       | 7,26         | 7,26       | 6,07        | 7,03       | 6,18         | 6,67       | 6,21         | 6,27       | 6,03         | 7,52       |
|                                | median (y) | 4,53         | 4,60       | 5,58         | 5,58       | 4,53        | 4,60       | 3,46         | 3,46       | 4,53         | 4,36       | 4,45         | 5,72       |
|                                | range (y)  | 0-14.5       | 0-14.5     | 0.6-14.3     | 0.6-14.3   | 0-14.5      | 0-14.5     | 0-16.6       | 0-16.6     | 0-14.4       | 0-14.4     | 0-14.3       | 0.5-14.3   |
| Bone metastasis-free survival  |            |              |            |              |            |             |            |              |            |              |            |              |            |
| All patients                   | number (n) | 100          | 70         | 26           | 15         | 74          | 55         | 28           | 21         | 55           | 39         | 36           | 23         |
|                                | events (n) | 30           | 0          | 11           | 0          | 19          | 0          | 7            | 0          | 16           | 0          | 13           | 0          |
|                                | mean (y)   | 6,97         | 8,53       | 5,50         | 6,93       | 7,48        | 8,97       | 5,90         | 6,65       | 6,38         | 7,61       | 6,26         | 8,16       |
|                                | median (y) | 5,33         | 10,31      | 4,53         | 4,61       | 6,60        | 11,85      | 3,89         | 6,37       | 4,60         | 5,49       | 4,36         | 11,31      |
|                                | range (y)  | 0-14.7       | 0-14.7     | 0.1-14.2     | 0.6-14.2   | 0-14.7      | 0-14.7     | 0-16.6       | 0-16.6     | 0-14.4       | 0-14.4     | 0-14.3       | 0-14.3     |
| ER pos patients                | number (n) | 40           | 27         | 11           | 2          | 29          | 25         | 12           | 7          | 21           | 14         | 19           | 13         |
|                                | events (n) | 13           | 0          | 9            | 0          | 4           | 0          | 5            | 0          | 7            | 0          | 6            | 0          |
|                                | mean (y)   | 8,27         | 10,06      | 3,54         | 2,62       | 10,07       | 10,65      | 7,29         | 9,47       | 6,77         | 7,73       | 6,50         | 8,09       |
|                                | median (y) | 9,03         | 12,52      | 2,06         | 2,62       | 12,01       | 12,55      | 7,30         | 10,77      | 5,49         | 6,11       | 5,94         | 11,57      |
|                                | range (y)  | 0-14.7       | 0-14.7     | 0.6-9.8      | 0.6-4.6    | 0-14.7      | 0-14.7     | 0-13.4       | 2.5-13.4   | 0-14.4       | 0-14.4     | 0-14.3       | 0-14.3     |
| ER neg patients                | number (n) | 56           | 39         | 14           | 12         | 42          | 27         | 13           | 11         | 31           | 22         | 17           | 10         |
|                                | events (n) | 17           | 0          | 2            | 0          | 15          | 0          | 2            | 0          | 9            | 0          | 7            | 0          |
|                                | mean (y)   | 5,90         | 7,44       | 6,48         | 7,12       | 5,71        | 7,59       | 5,99         | 6,67       | 5,43         | 6,75       | 6,00         | 8,25       |
|                                | median (y) | 4,23         | 5,46       | 4,83         | 4,95       | 3,92        | 7,46       | 3,46         | 3,46       | 3,68         | 4,53       | 4,27         | 8,38       |
|                                | range (y)  | 0-14.5       | 0-14.5     | 0.1-14.2     | 0.6-14.2   | 0-14.5      | 0-14.5     | 0-16.6       | 0-16.6     | 0-14.4       | 0-14.4     | 0-14.2       | 0.5-14.2   |

All, all patients in the indicated analysis; event-free, those patients without an event in the indicated analysis; ER, estrogen receptor; pos, positive; neg, negative. The number of patients (n), the number of events (n), as well as the mean, median, and range for the follow-up time in years (y) is indicated in each analysis and subgroup

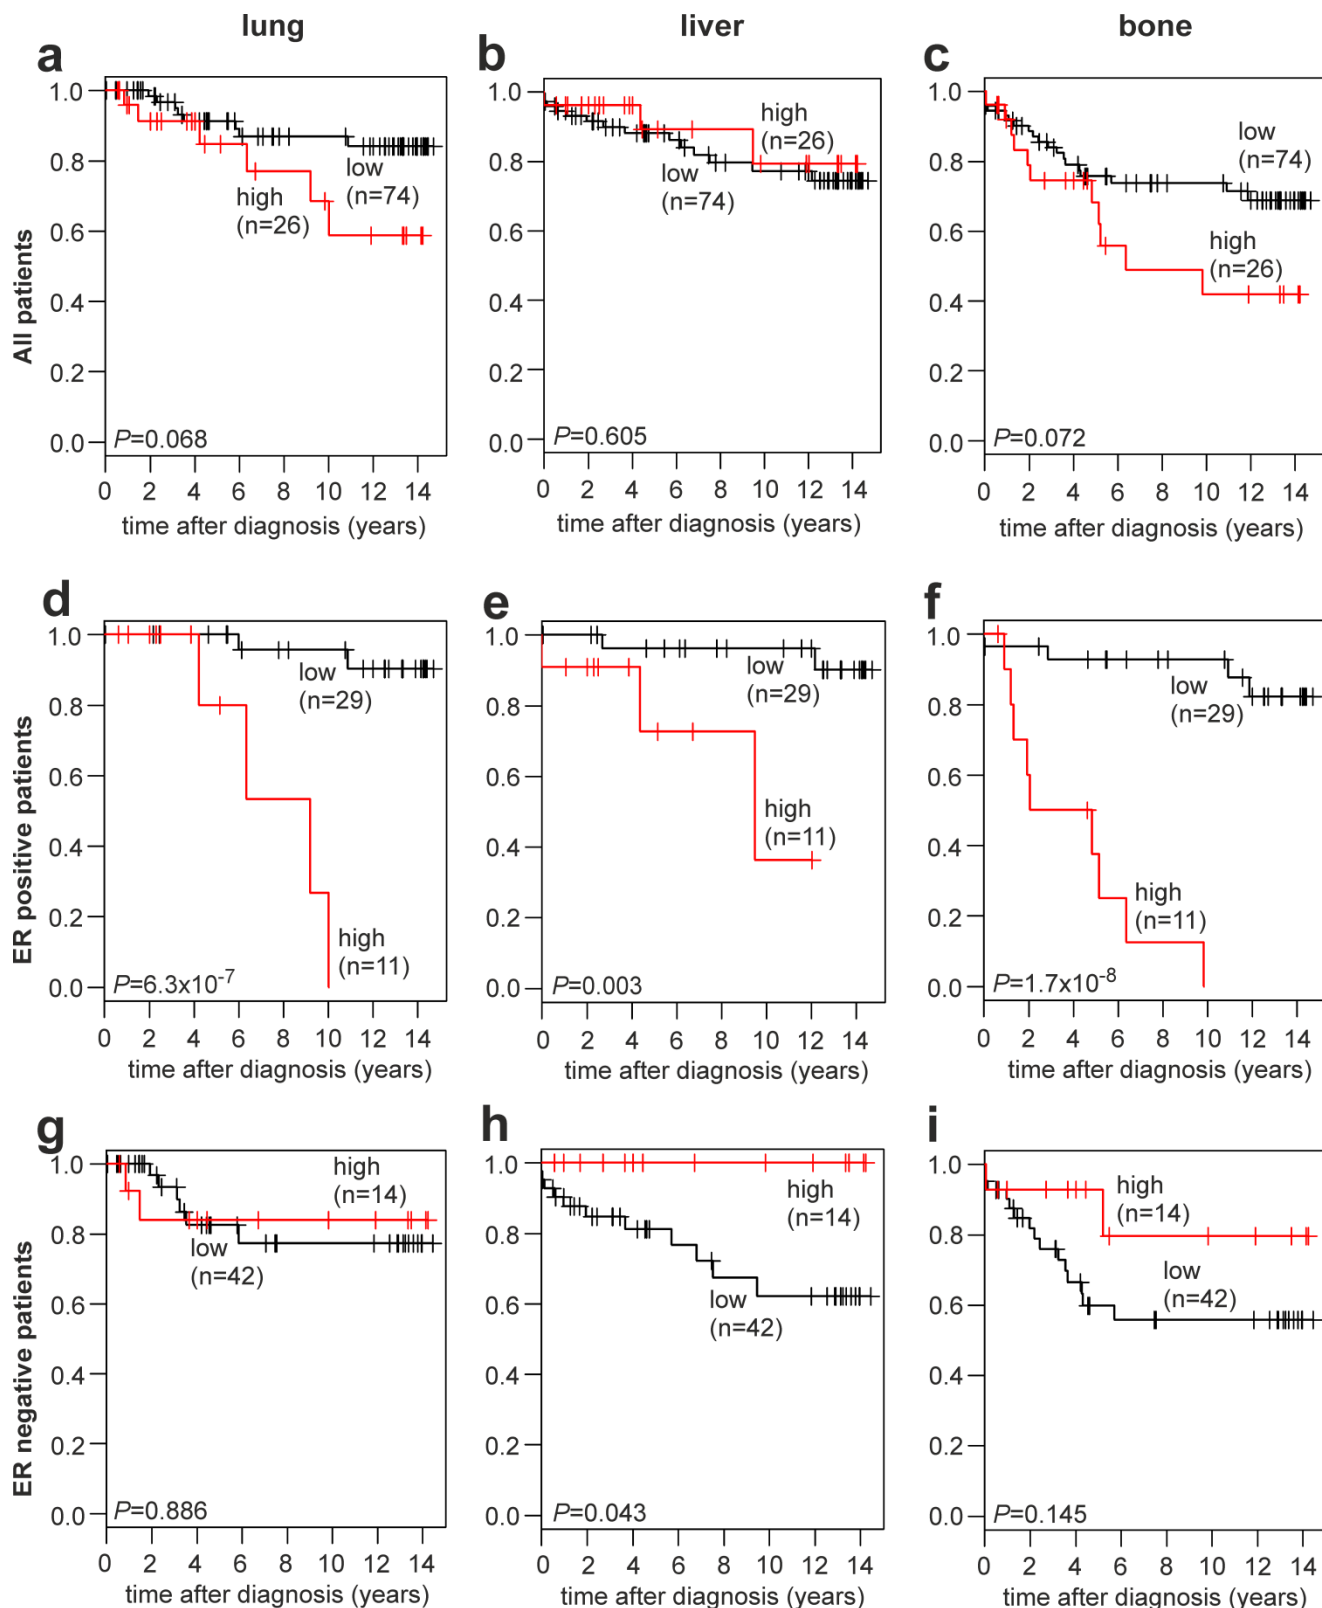

**Supplementary Fig. 1** Association of *CYP19A1* mRNA expression with the metastasis-free survival of human breast cancer patients. Kaplan-Meier analyses of the lung metastasis-free survival (a, d, g), liver metastasis-free survival (b, e, h) and bone metastasis-free survival (c, f, i) in unselected patients (a-c; n=100), ER-positive patients (d-f; n=40) and ER-negative patients (g-i; n=56) are shown. Patient subgroups with high and low *CYP19A1* expression and their numbers (n) are indicated in each panel. ER, estrogen receptor

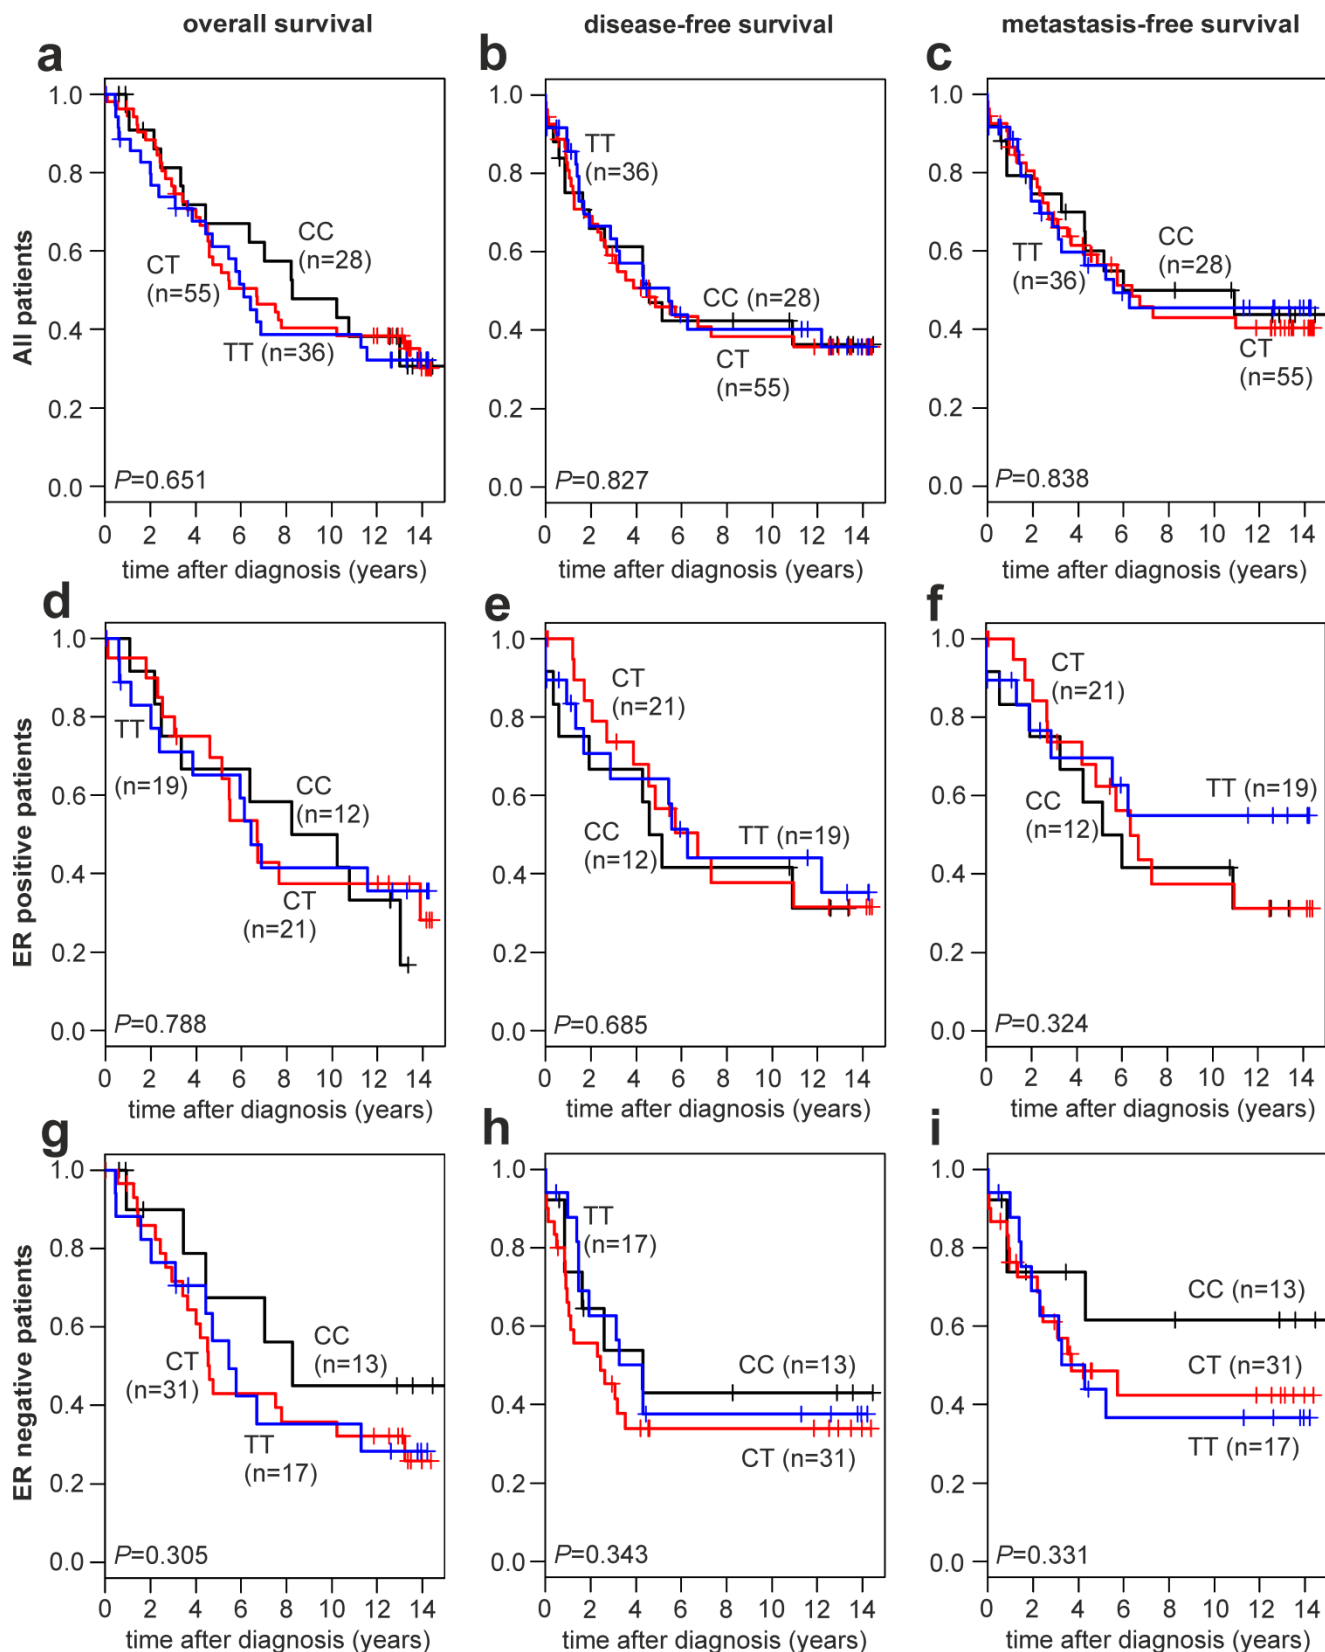

**Supplementary Fig. 2** Association of *CYP19A1* rs10046 genotypes with the survival of human breast cancer patients. Kaplan-Meier analyses of the overall survival (a, d, g), disease-free survival (b, e, h) and metastasis-free survival (c, f, i) in unselected patients (a-c;  $n=119$ ), ER positive patients (d-f;  $n=52$ ) and ER negative patients (g-i;  $n=61$ ) are shown. Patient subgroups with rs10046 genotypes CC, CT and TT as well as their numbers ( $n$ ) are indicated in each panel. ER, estrogen receptor

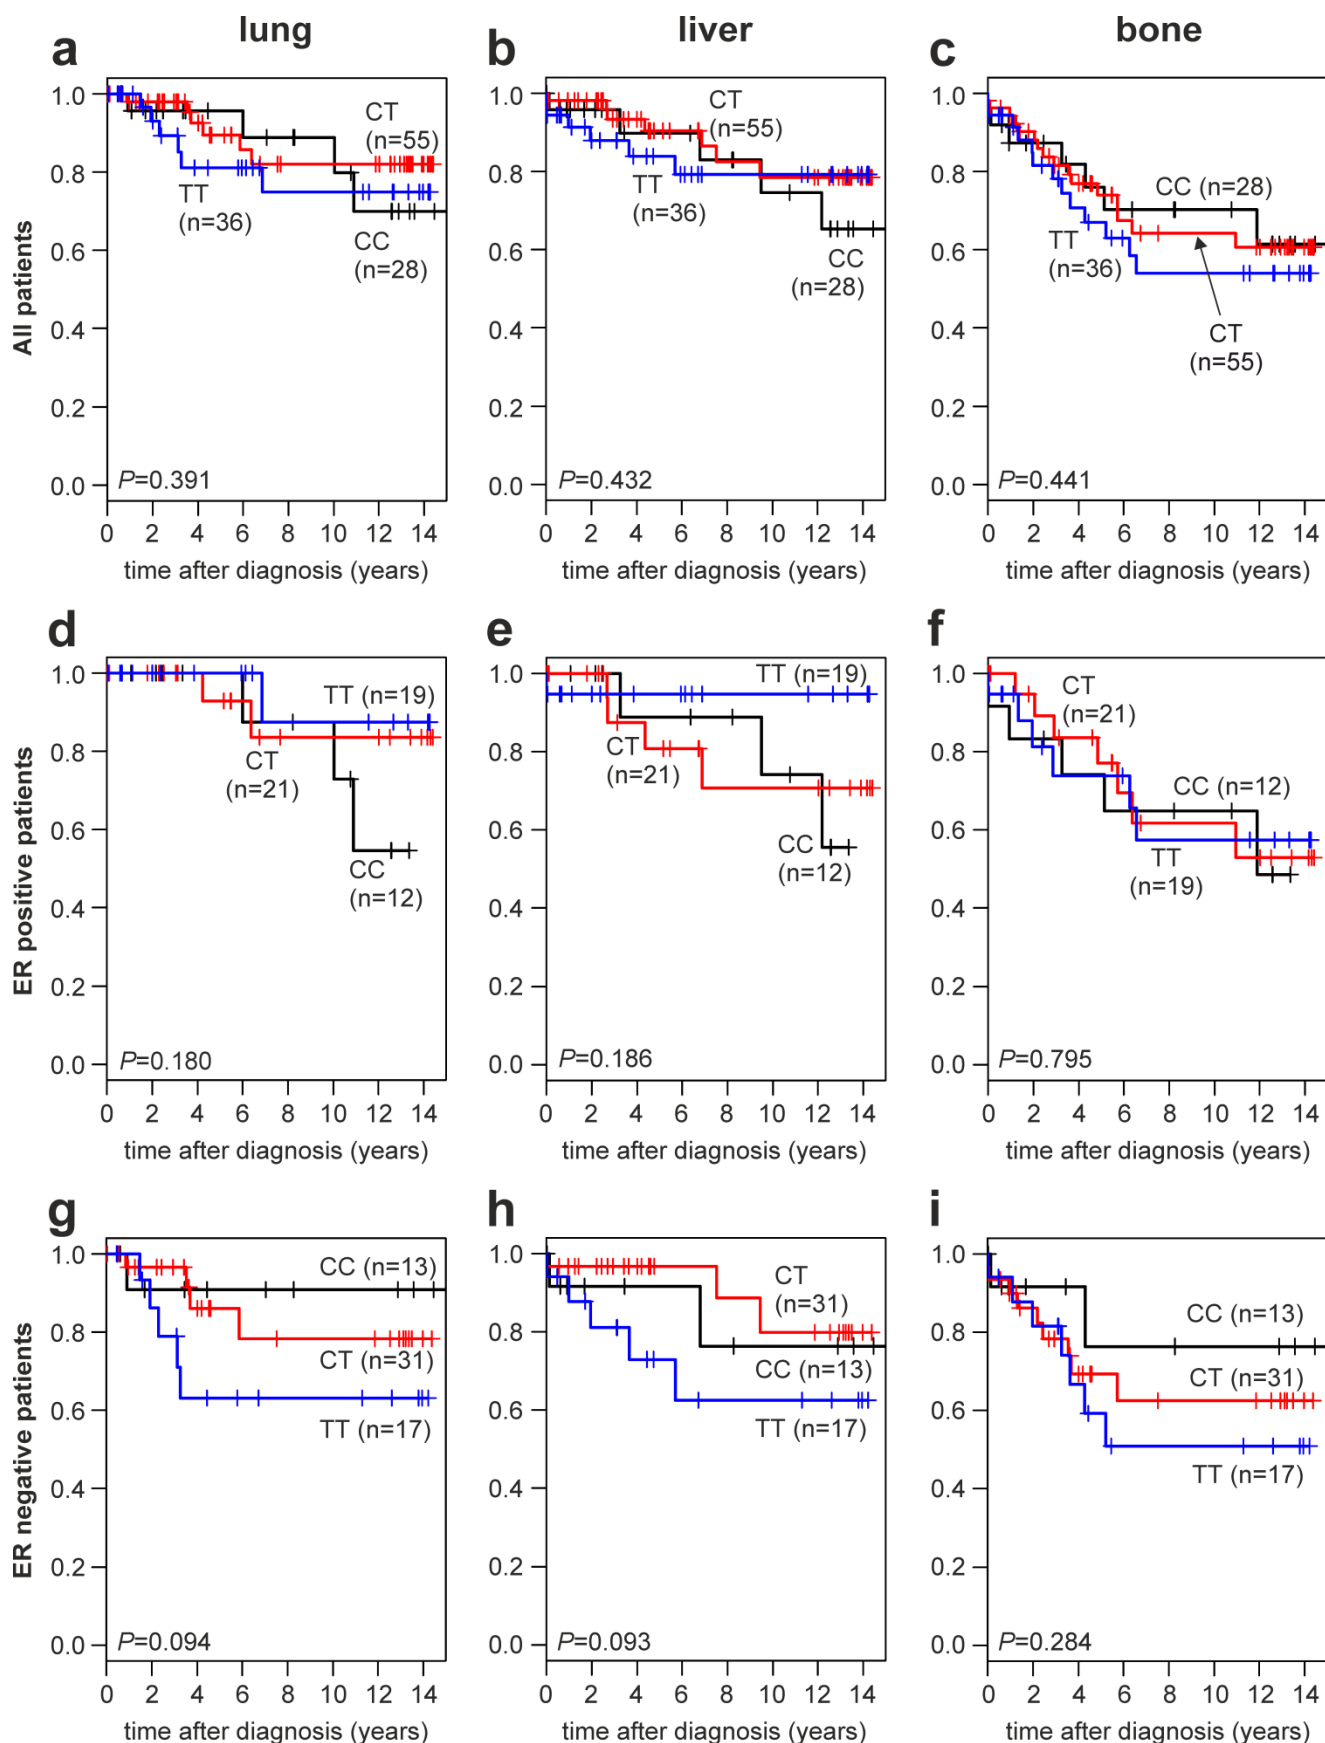

**Supplementary Fig. 3** Association of *CYP19A1* rs10046 genotypes with the metastasis-free survival of human breast cancer patients. Kaplan-Meier analyses of the lung metastasis-free survival (a, d, g), liver metastasis-free survival (b, e, h) and bone metastasis-free survival (c, f, i) in unselected patients (a-c; n=119), ER positive patients (d-f; n=52) and ER negative patients (g-i; n=61) are shown. Patient subgroups with rs10046 genotypes CC, CT and TT as well as their numbers (n) are indicated in each panel. ER, estrogen receptor

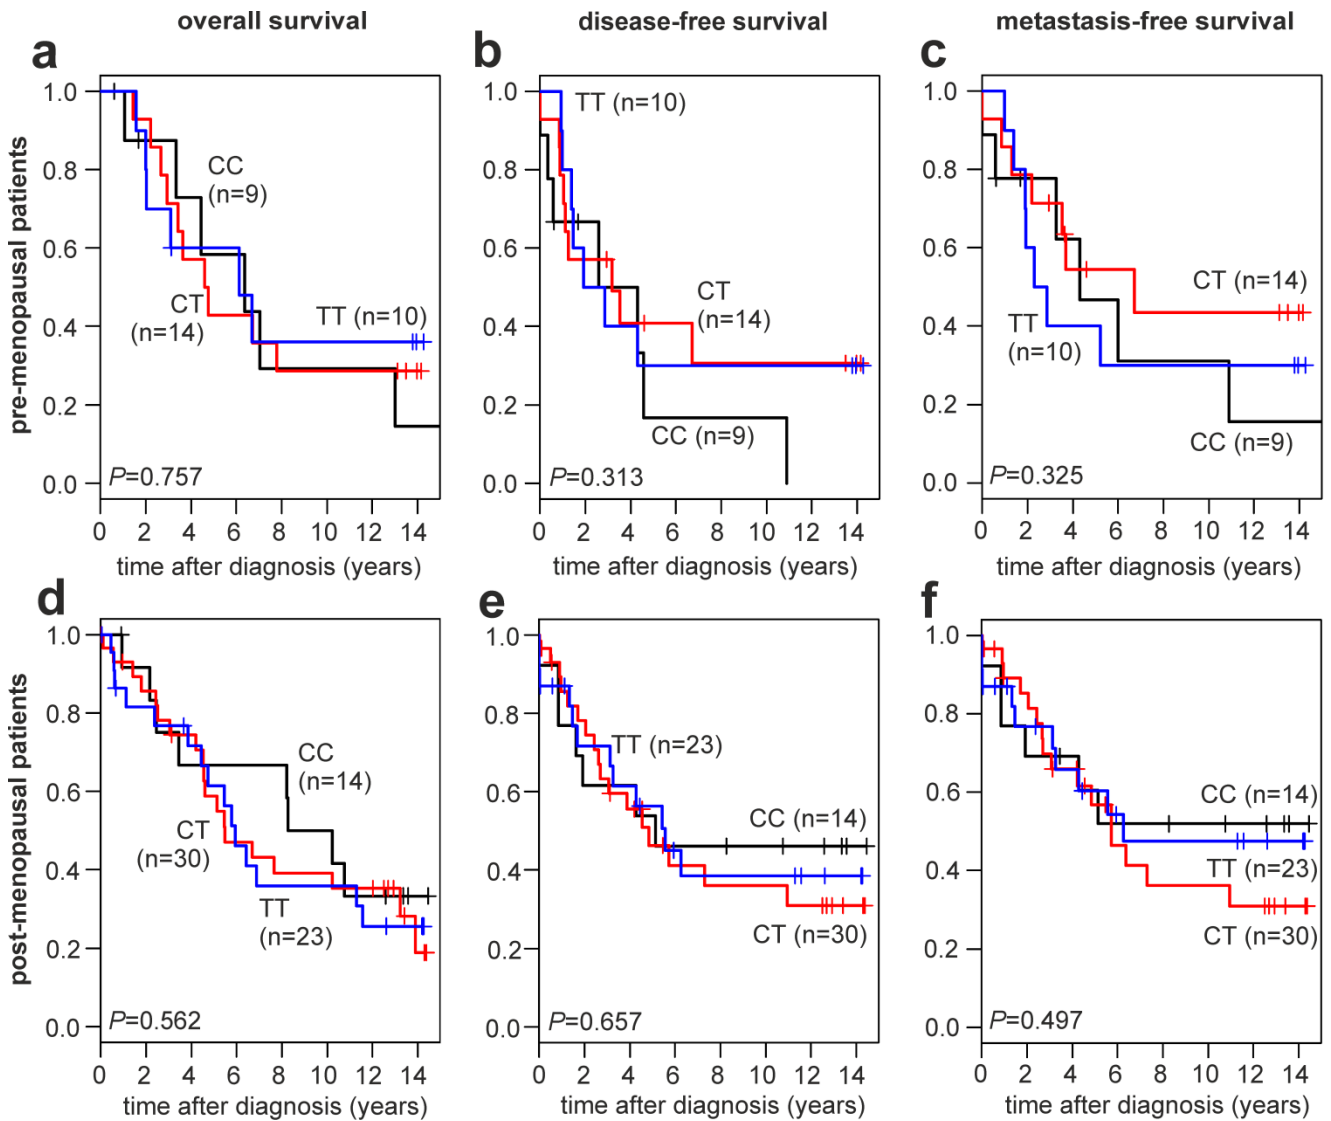

**Supplementary Fig. 4** Association of *CYP19A1* rs10046 genotypes with the survival of human breast cancer patients. Kaplan-Meier analyses of the overall survival (a, d), disease-free survival (b, e) and metastasis-free survival (c, f) in pre-menopausal patients (a-c; n=33) and post-menopausal patients (d-f; n=67) are shown. Patient subgroups with rs10046 genotypes CC, CT and TT as well as their numbers (n) are indicated in each panel.



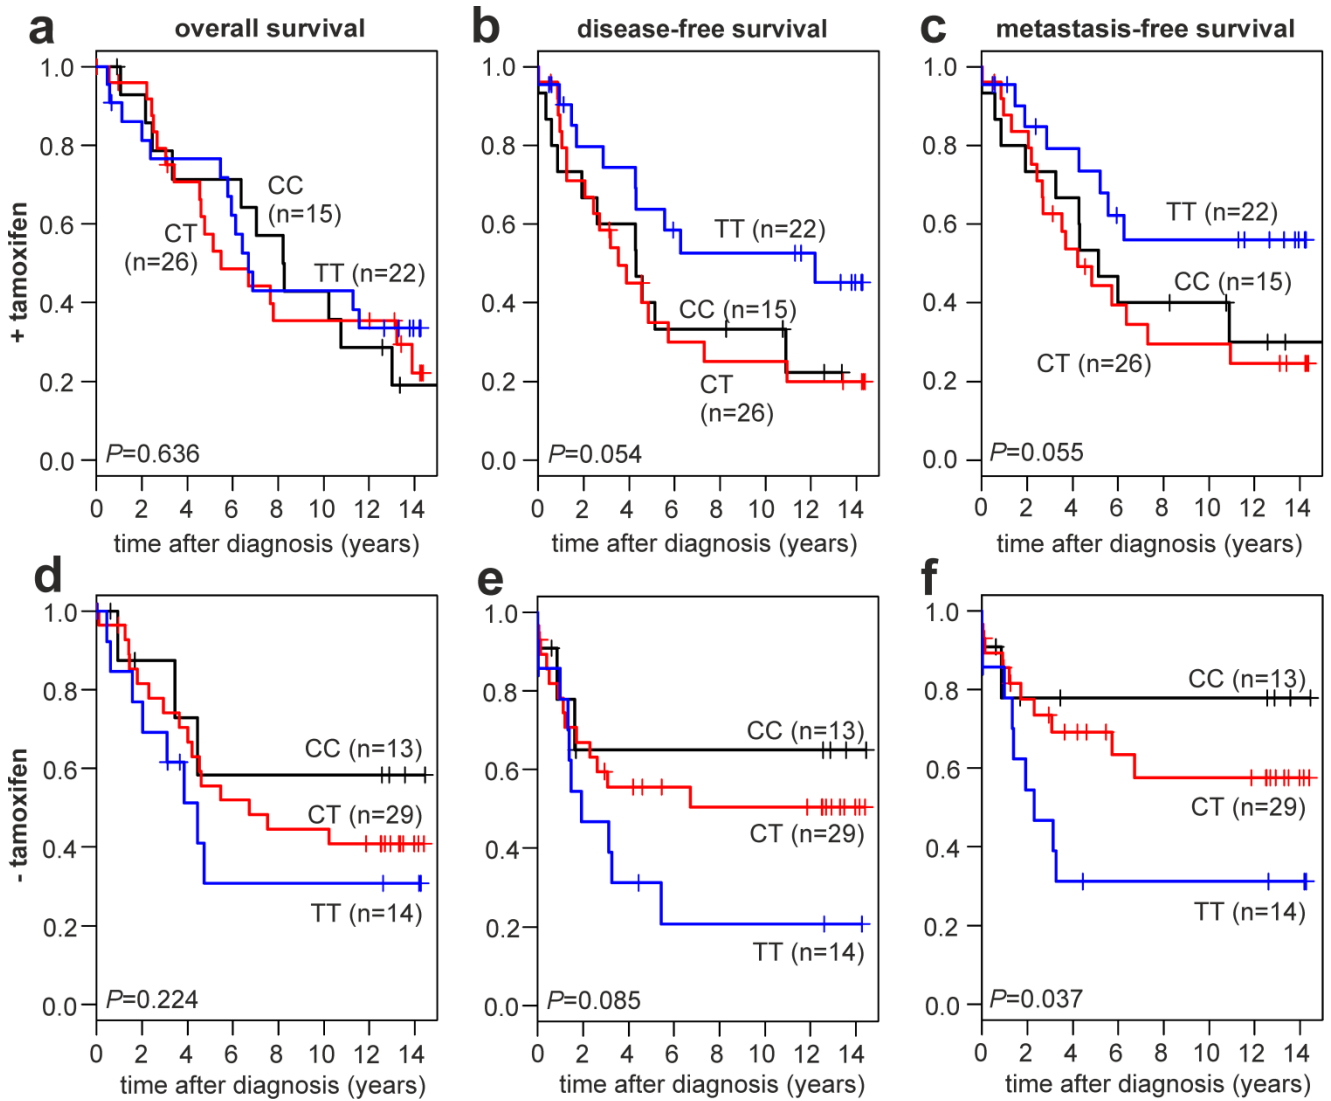

**Supplementary Fig. 5** Association of *CYP19A1* rs10046 genotypes with the survival of human breast cancer patients. Kaplan-Meier analyses of the overall survival (a, d), disease-free survival (b, e) and metastasis-free survival (c, f) in patients treated with tamoxifen (a-c; n=63) and patients not treated with tamoxifen (d-f; n=56) are shown. Patient subgroups with rs10046 genotypes CC, CT and TT as well as their numbers (n) are indicated in each panel.

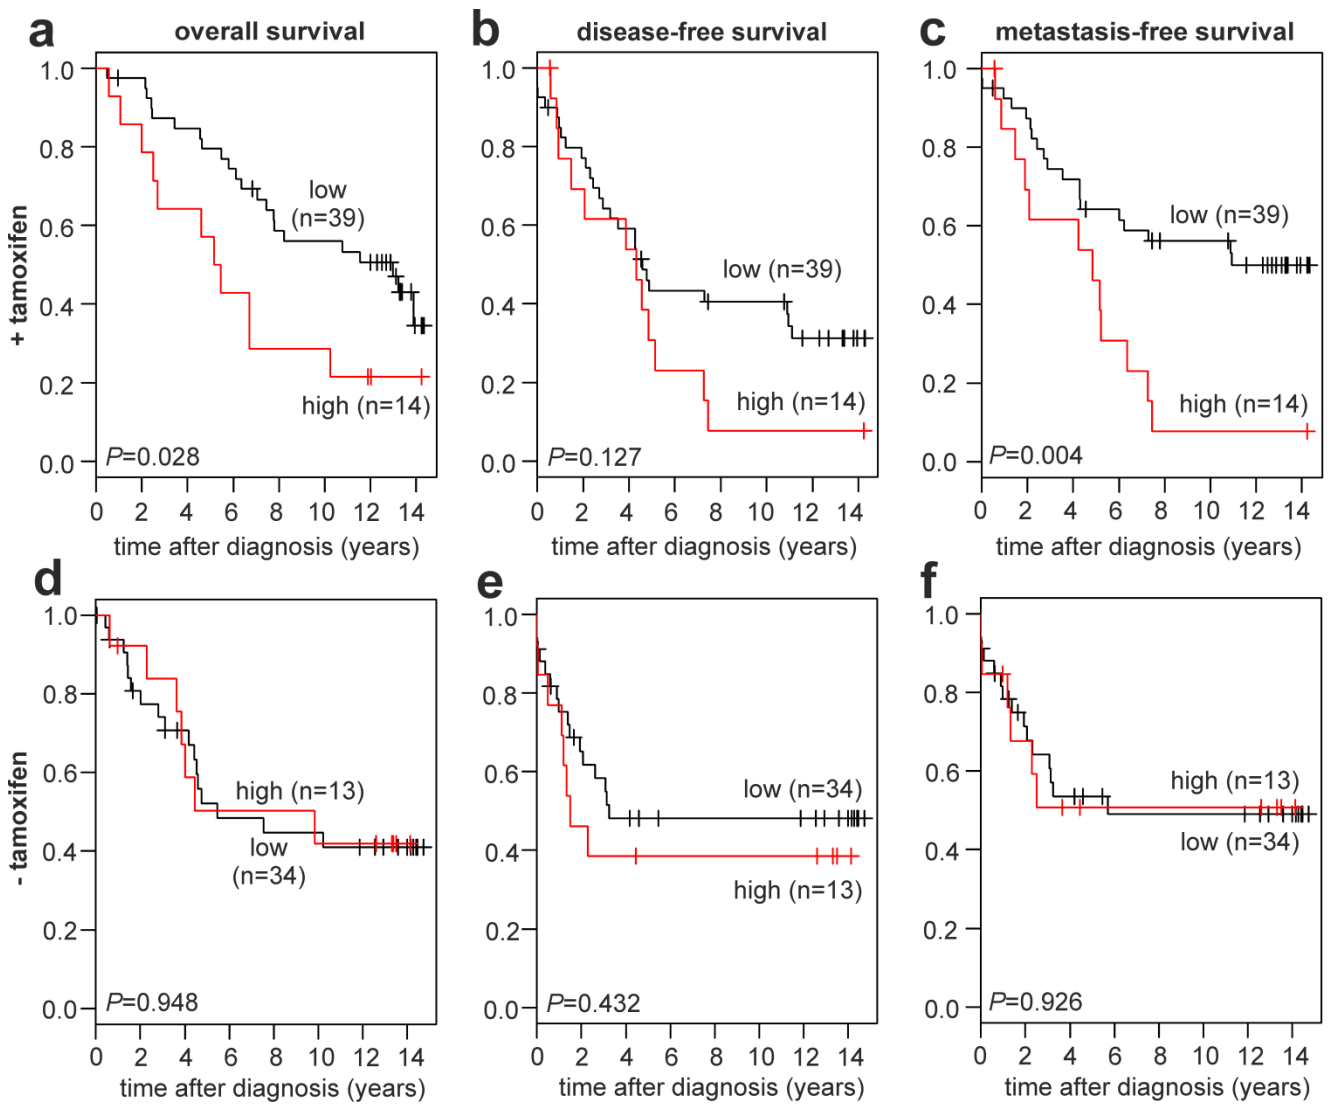

**Supplementary Fig. 6** Association of *CYP19A1* mRNA expression with the survival of human breast cancer patients. Kaplan-Meier analyses of the overall survival (a, d), disease-free survival (b, e) and metastasis-free survival (c, f) in patients treated with tamoxifen (a-c; n=53) and patients not treated with tamoxifen (d-f; n=47) are shown. Patient subgroups with high and low *CYP19A1* expression and their numbers (n) are indicated in each panel.
